1 **Title: GASOTRANSMITTER MODULATION OF HYPOGLOSSAL MOTONEURON**  
2 **ACTIVITY**  
3

4 **Abbreviated Title:** Heme Oxygenase and Hypoglossal Motor Neurons  
5

6 **Authorship:** Brigitte Browe<sup>1,2,3</sup>, Ying-Jie Peng<sup>1,3</sup>, Jayasri Nanduri<sup>1,3</sup>, Nanduri R. Prabhakar<sup>1,2,3</sup>,  
7 Alfredo J. Garcia III<sup>1,2,3</sup>

8 **Affiliations:**

9 <sup>1</sup>Institute for Integrative Physiology;  
10 <sup>2</sup>The University of Chicago Neuroscience Institute; and  
11 <sup>3</sup>Department of Medicine, Section of Emergency Medicine at The University of Chicago.  
12

13 **Keywords:** hydrogen sulfide, heme oxygenase 2, hypoglossal motor nucleus  
14

15 **Authors Contribution:** Experimental design by AJG, NRP, and BB. Experiments and analyses  
16 performed by BB, AJG, SK and JN. BB wrote the first draft. BB, AJG, and NRP revised and  
17 edited the manuscript.

18 **Correspondence:** Alfredo Garcia: [ajgarcia3@uchicago.edu](mailto:ajgarcia3@uchicago.edu)  
19

20 **Figure Number: 10**

**Abstract: 234**

21 **Table Number: 0**

**Introduction: 400**

22 **Discussion: 974**  
23

24 **Acknowledgements:**  
25

26 **Funding Sources:**

27 This work was supported by NIH P01 HL144454 (NRP), NIH R01NS107421 (AJG), NIH  
28 R01HL163965 (AJG) and NIH R01DA057767 (AJG).  
29

30 **Abstract**

31 Obstructive sleep apnea (OSA) is characterized by sporadic collapse of the upper airway  
32 leading to periodic disruptions in breathing. Upper airway patency governed by genioglossal  
33 nerve activity originates from the hypoglossal motor nucleus. Mice with targeted deletion of the  
34 gene *Hmox2*, encoding the carbon monoxide (CO) producing enzyme, heme oxygenase-2 (HO-  
35 2), exhibit severe OSA, yet the contribution of central HO-2 dysregulation to the phenomenon is  
36 unknown. Using the rhythmic brainstem slice preparation, which contains the preBötzinger  
37 complex (preBötC) and the hypoglossal nucleus, we tested the hypothesis that central HO-2  
38 dysregulation weakens hypoglossal motoneuron output. Disrupting HO-2 activity increased  
39 transmission failure as determined by the intermittent inability of the preBötC rhythm to trigger  
40 output from the hypoglossal nucleus. Failed transmission was associated with a reduced input-  
41 output relationship between the preBötC and the motor nucleus. These network phenomena  
42 were related to smaller inspiratory drive currents and reduced intrinsic excitability among  
43 hypoglossal neurons. In addition to HO-2, hypoglossal neurons also expressed the CO-  
44 regulated H<sub>2</sub>S producing enzyme cystathionine  $\beta$ -lyase (CSE). H<sub>2</sub>S abundance was higher in  
45 hypoglossal neurons of HO-2 null mice than wild-type controls. Disrupting CSE function  
46 normalized transmission in HO-2 null mice and an H<sub>2</sub>S donor mimicked the effects of HO-2  
47 dysregulation. These findings demonstrate a hitherto uncharacterized modulation of  
48 hypoglossal activity through the interaction of HO-2 and CSE-derived H<sub>2</sub>S, and supports the  
49 perspective that centrally derived HO-2 activity plays an important role regulating upper airway  
50 control.

51

52

53

54

55

56 **Introduction**

57       Obstructive sleep apnea (OSA) is a prevalent breathing disorder affecting nearly a billion  
58 people throughout the world<sup>1,2</sup>. It is characterized by the periodic cessation of breathing during  
59 sleep due to sporadic upper airway collapse. When left untreated, OSA predisposes the  
60 individual to a variety of diseases including hypertension<sup>3,4</sup>, diabetes<sup>5,6</sup>, and cognitive decline<sup>7,8</sup>.  
61 Multiple factors contribute to the genesis of OSA including compromised pharyngeal anatomy  
62 <sup>9,10</sup>, inadequate upper airway muscle function<sup>11-13</sup>, low arousal threshold<sup>14</sup>, and a hypersensitive  
63 chemoreflex (i.e., high loop gain <sup>15</sup>).

64       Peng et al. recently reported that mice with deletion of the *Hmox 2* gene, which encodes  
65 the enzyme heme oxygenase 2 (HO-2), exhibit a high incidence of OSA<sup>16</sup>. OSA in HO-2 null  
66 mice was attributed in part to the increased loop gain arising from the heightened carotid body  
67 chemo reflex<sup>16-19</sup>. While HO-2 produces several bioactive products<sup>20</sup>, the enhanced carotid  
68 body chemo reflex and subsequent OSA phenotype is attributed to the loss of HO-2 dependent  
69 CO production<sup>16</sup>. However, we hypothesize that additional factors, such as changed activities in  
70 the central nervous system, may also contribute to the OSA phenotype observed in HO-2 null  
71 mice.

72       Sporadic loss of neuromuscular control over upper airway muscles is a key contributor to  
73 producing obstructive apneas<sup>21,22</sup>. Predisposition to intermittent reductions in airway patency  
74 can originate from changes in CNS activity. Disrupting rhythmic excitation of the hypoglossal  
75 nucleus that drives genioglossal nerve activity increases the likelihood for the tongue to occlude  
76 the upper airway during inspiration. Such disruptions may involve changing the state-  
77 dependent balance between excitation and inhibition received by respiratory hypoglossal motor

78 neurons<sup>23</sup> and/or the direct modulation of intrinsic excitability of hypoglossal neurons<sup>24-26</sup>. It,  
79 however, is unknown whether impaired HO-2 signaling in the hypoglossal nucleus influences  
80 synaptic and/or intrinsic neuronal properties to alter output from the motor nucleus that may  
81 ultimately contribute to upper airway obstruction.

82 We tested this possibility using a combination of electrophysiological, genetic, and  
83 pharmacological approaches in the rhythmic medullary brainstem slice preparation. We found  
84 that dysregulated HO-2 activity in the hypoglossal nucleus acts through CSE-dependent H<sub>2</sub>S  
85 signaling to reduce motor neuron excitability. This in turn, diminishes the input-output  
86 relationship between the preBötC and hypoglossal nucleus, and increases the likelihood of  
87 transmission failure between the premotor rhythm and motor nucleus output. These  
88 observations indicate that hypoglossal HO-2 / CO and CSE / H<sub>2</sub>S activities interact as important  
89 modulators of hypoglossal output that potentially contributes to changed upper airway tone  
90 when dysregulated.

91 **Methods**

92 **Study Approval.** In accordance with National Institutes of Health guidelines, all animal  
93 protocols were performed with the approval of the Institute of Animal Care and Use Committee  
94 at The University of Chicago (ACUP 72486, ACUP 71811).

95 **Experimental Animals.** Experiments were performed using neonatal (postnatal day 6 to  
96 postnatal day 12) wildtype mice (C57/BL6; Charles River), HO-2 null mice (from S. H. Snyder;  
97 The Johns Hopkins University), and HO-2:CSE double-null mice. HO-2:CSE double-null mice  
98 were created by crossing HO-2 null females with CSE null males (from R. Wang, Department of  
99 Biology, Laurentian University, Sudbury, ON, Canada). Tissues from both sexes were used. No  
100 sex-based differences were observed; therefore, all sexes were pooled for analysis. All litters  
101 were housed with their dam in ALAAC-approved facilities on a 12 hour / 12-hour light-dark  
102 cycle.

103 **Pharmacological Agents.** Heme oxygenase activity was blocked using bath application of  
104 Chromium (III) Mesoporphyrin IX chloride (ChrMP459, 20 $\mu$ M; Frontiers Sciences, Newark DE).  
105 CORM-3 (20 $\mu$ M; Sigma-Aldrich St. Louis MO), a CO-donor, was bath applied following  
106 ChrMP459 application. NaHS (10 $\mu$ M to 100  $\mu$ M; Sigma-Aldrich), a H<sub>2</sub>S donor, was bath  
107 applied. In all patch clamp experiments, fast synaptic glycinergic and GABAergic inhibition was  
108 blocked by bath application of strychnine (1 $\mu$ M; Sigma-Aldrich), and picrotoxin (50 $\mu$ M; Sigma-  
109 Aldrich), respectively. Inhibition of CSE production was accomplished by *in vivo* L-  
110 propargylglycine (L-PAG, 30mg/kg (Sigma-Aldrich) administered (*i.p.* injection) 2.5 to 3 hrs prior

111 to preparation of the rhythmic brainstem slice preparation. Inhibition of potassium channels  
112 SK<sub>Ca</sub> and ATP-sensitive potassium channel (K<sub>ATP</sub>) was via bath application of APAMIN (200 μM;  
113 Sigma-Aldrich) and Tolbutamide (100 μM; Sigma-Aldrich) respectively.

114 **Measurement of H<sub>2</sub>S Production.** Coronal brainstem sections (300μm thick) were cut with a  
115 cryostat at -20°C. The hypoglossal nucleus and control brainstem regions were excised with a  
116 chilled micro-punch needle. Hypoglossal tissue from a single brainstem was not sufficient for  
117 effectively measuring H<sub>2</sub>S levels; therefore, we pooled micro punched tissue from two mice for  
118 each sample where H<sub>2</sub>S levels measured. H<sub>2</sub>S levels were determined as described  
119 previously<sup>27</sup>. Briefly, cell homogenates were prepared in 100 mM potassium phosphate buffer  
120 (pH 7.4). The enzyme reaction was carried out in sealed tubes. The assay mixture in a total  
121 volume of 500μL contained (in final concentration): 100 mM potassium phosphate buffer (pH  
122 7.4), 800μM L-cysteine, 80μM pyridoxal 5'-phosphate with or without L-PAG (20μM) and cell  
123 homogenate (20μg of protein), was incubated at 37°C for 1 hr. At the end of the reaction,  
124 alkaline zinc acetate (1% mass / volume; 250μL) and trichloroacetic acid (10% vol/vol) were  
125 sequentially added to trap H<sub>2</sub>S and stop the reaction, respectively. The zinc sulfide formed was  
126 reacted with acidic N,N-dimethyl-p-phenylenediamine sulfate (20μM) and ferric chloride (30μM)  
127 and the absorbance was measured at 670 nm using Shimadzu UV-VIS Spectrophotometer. L-  
128 PAG inhibitable H<sub>2</sub>S concentration was calculated from a standard curve and values are  
129 expressed as nanomoles of H<sub>2</sub>S formed per hour per mg of protein.

130 **Immunohistochemistry.** Anaesthetized mice (urethane, 1.2g•kg<sup>-1</sup> *i.p.*) were perfused  
131 transcardially with heparinized phosphate-buffered saline (PBS) for 20 min followed by 4%  
132 paraformaldehyde in PBS. Brainstems were harvested, post-fixed in 4% paraformaldehyde  
133 overnight, and cryoprotected in 30% sucrose/PBS at 4°C. Frozen tissues were serially  
134 sectioned at a thickness of 20μm (coronal section) and stored at -80°C. Sections were treated  
135 with 20% normal goat serum, 0.1% bovine serum albumin and 0.1% Triton X-100 in PBS for 30

136 min and incubated with primary antibodies against choline acetyltransferase (ChAT, 1:100;  
137 Millipore; #AB144P), HO-2 (1:200, Novus Biologicals; # NBP1-52849) and CSE (1:250; gift  
138 from Dr. Schenider) followed by Texas Red-conjugated goat anti-mouse IgG or FITC-  
139 conjugated goat anti-rabbit IgG (1:250; Molecular Probes). After rinsing with PBS, sections were  
140 mounted in Vecta shield containing DAPI (Vector Labs) and analyzed using a fluorescent  
141 microscope (Eclipse E600; Nikon).

142 ***Brainstem Slice for Electrophysiology.*** The isolated rhythmic brainstem slice was prepared  
143 as previously described<sup>28</sup>. Briefly, animals were euthanized by decapitation. Brainstems were  
144 rapidly dissected, isolated, and placed into ice cold artificial cerebral spinal fluid (aCSF)  
145 (composition in mM: 118 NaCl, 25 NaHCO<sub>3</sub>, 1 NaH<sub>2</sub>PO<sub>4</sub>, 1 MgCl<sub>2</sub>, 3 KCl, 30 Glucose, 1.5 CaCl<sub>2</sub>,  
146 pH=7.4) equilibrated with 95% O<sub>2</sub>, 5% CO<sub>2</sub>. The isolated brainstem was glued to an agar block  
147 (dorsal face to agar) with the rostral face up and submerged in aCSF equilibrated with  
148 carbogen. Serial cuts were made through the brainstem until the appearance of anatomical  
149 landmarks such as the narrowing of the fourth ventricle and the hypoglossal axons. The  
150 preBötC and XIIIn was retained in a single transverse brainstem slice (thickness: 560 ± 40µm).  
151 The slice was transferred into the recording chamber (~6mL volume) where it was continuously  
152 superfused with recirculating aCSF (flow rate: 12 -15mL/min). Prior to recording, extracellular  
153 KCl was raised to 8mM and the spontaneous rhythm was allowed to stabilize prior to the start of  
154 every experiment.

155 ***Electrophysiology.*** Extracellular population activity was recorded with glass suction pipettes  
156 filled with aCSF. Pipettes were positioned over the ventral respiratory column containing the  
157 preBötC and over the medial dorsal column containing the hypoglossal nucleus. In some  
158 experiments, a third pipette was positioned between the preBötC and hypoglossal nucleus just  
159 lateral to the axon tract to record transmission through the premotor field containing  
160 intermediate premotor inspiratory neurons<sup>29,30</sup>. Extracellular population activity was recorded

161 with glass suction pipettes filled with aCSF<sup>31</sup>. The recorded signal was sampled at 5kHz,  
162 amplified 10,000X, with a lowpass filter of 10 kHz using an A-M instruments (A-M Systems,  
163 Sequim, WA, USA) extracellular amplifier. The signal was then rectified and integrated using  
164 Clampfit electronic filter. Recordings were stored on a computer for *posthoc* analysis.

165 All intracellular recordings were made using the Multiclamp 700B (Molecular Devices:  
166 [https://www.moleculardevices.com/systems/conventional-patch-clamp/multiclamp-700b-](https://www.moleculardevices.com/systems/conventional-patch-clamp/multiclamp-700b-microelectrode-amplifier)  
167 [microelectrode-amplifier](https://www.moleculardevices.com/systems/conventional-patch-clamp/multiclamp-700b-microelectrode-amplifier)). Acquisition and post hoc analyses were performed using the Axon  
168 pCLAMP10 software suite (Molecular Devices: [https://www.moleculardevices.com/system/axon-](https://www.moleculardevices.com/system/axon-conventional-patch-clamp/pclamp-11-software-suite)  
169 [conventional-patch-clamp/pclamp-11-software-suite](https://www.moleculardevices.com/system/axon-conventional-patch-clamp/pclamp-11-software-suite)).

170 Whole cell patch clamp recordings of hypoglossal motor neurons were obtained using the blind-  
171 patch technique with a sample frequency of 40 kHz. Recordings were made with unpolished  
172 patch electrodes, pulled from borosilicated glass pipettes with a capillary filament<sup>31</sup>. The  
173 electrodes had a resistance of 3.5-8 MΩ when filled with the whole cell patch clamp pipette  
174 solution containing (in mM): 140 K-gluc acid, 1 CaCl<sub>2</sub>, 10 EGTA, 2 MgCl<sub>2</sub>, 4 Na<sub>2</sub>-ATP, 10  
175 HEPES. Patch clamp experiments were performed with a patch clamp amplifier (Multiclamp  
176 700B, Molecular Devices, Sunnyvale, CA, USA), and the software program pCLAMP 10.0  
177 (Molecular Devices). Neurons located at least two to three cell layers (about 75-250μm) rostral  
178 from the caudal surface of the slice were recorded. The liquid junction potential was calculated  
179 to be -12mV and was subtracted from the membrane potential. The series resistance was  
180 compensated and corrected throughout each experiment. In voltage clamp experiments,  
181 membrane potential was held at -60mV. Current clamp experiments used a holding potential  
182 between 0 and -100pA to establish the baseline resting membrane potential between -55 and -  
183 70mV. In some cases, we determined rheobases using a ramp protocol in our current clamp  
184 recordings. This ramp protocol consisted of a hyperpolarizing step (-100pA) succeeded by the  
185 injection of a ramping depolarizing current (122pA/sec; peak current 600pA).



186 **Statistical Analyses.** Unless otherwise explicitly stated elsewhere, each n value represents an  
187 individual animal that served as a biological replicate for a given measurement. Transmission  
188 was expressed as a percentage of the hypoglossal network bursts corresponding to the total  
189 network bursts from either the preBötC or the premotor field. Bursts were considered  
190 corresponding if initial start time of bursts were within 500-750ms of each other (corresponding  
191 time was maximized until only one hypoglossal burst per preBötC was detected). Mean I/O and  
192 transmission values for each slice were calculated using a 120 s window. This window was  
193 taken at the end of each baseline or pharmacological agent phase (each phase duration =  
194 600 sec). The input-output (I/O) ratio for each inspiratory event (defined by network a burst in  
195 preBötC) was calculated as previously described in <sup>31</sup>. I/O ratios values for preBötC bursts  
196 without a corresponding XIIIn burst were designated as 0. To illustrate the cycle-to-cycle input-  
197 output relationships between networks, heat maps of I/O ratio values were plotted for each slice  
198 included in the experiment. Each row represents sequential cycles from a single slice  
199 experiment. As the rhythmic frequency across preparations varied, the number of events (i.e.,  
200 cycle number) in the 120 s analysis window also varied; therefore, either the total number of  
201 cycles or 25 consecutive cycles from in a given analysis window were plotted.

202 Statistics were performed using Origin 8 Pro (OriginLab, RRID:SCR\_014212) or Prism 6  
203 (GraphPad Software; RRID:SCR\_015807). In cases where the distribution of data appeared  
204 normal, comparisons between two groups were conducted using either paired or unpaired two-  
205 tailed t-tests as appropriate. In cases, where the distribution of individual data points did not  
206 appear normal, the Wilcoxon match-paired signed rank test was performed. A one-way  
207 ANOVA was performed followed by *posthoc* Dunnett's test comparing experimental groups to  
208 control when a comparison of three or more groups. In plots where the mean  $\pm$  S.E.M. are  
209 presented, the mean and S.E.M. are overlaid on the individual results from the corresponding  
210 dataset. Differences were defined when the P-value was less than 0.05.

211 **Results**

212 ***Hypoglossal neurons express hemoxygenase-2 (HO-2).*** We first assessed whether  
213 hypoglossal neurons express HO-2. Hypoglossal neurons showed positive  
214 immunohistochemical expression for HO-2 as indicated by co-localization of HO-2 with Choline  
215 acetyl transferase (ChAT), an established marker of these neurons<sup>11</sup> (**Fig.1A**, n=3).

216 ***Disrupting HO-2 function impairs hypoglossal inspiratory activity.*** Extracellular field  
217 recordings in the rhythmic brainstem slice were simultaneously recorded from the preBötC and  
218 the corresponding motor output from the hypoglossal nucleus. Two approaches were employed  
219 to assess the role of HO-2: (1) using Cr(III) Mesoporphyrin IX chloride (ChrMP459, 20 $\mu$ M), an  
220 inhibitor of HO<sup>32</sup>; and (2) using brain slices from HO-2 null mice.

221 Representative extracellular field recordings from the preBötC and hypoglossal nucleus prior  
222 and during ChrMP459 exposure were shown in **Fig 1B** (n=11). While ChrMP459 suppressed  
223 hypoglossal burst amplitude (**Fig 1C, left**, n=11; Baseline: 99.57  $\pm$  0.60%, ChrM459: 81.80  $\pm$   
224 10.80%, P=0.007), the HO inhibitor had no effect on preBötC burst amplitude (**Fig 1C, right**,  
225 n=11; Baseline: 99.93  $\pm$  0.34%, ChrMP459: 93.23  $\pm$  4.80%, P=0.21). ChrMP459 consistently  
226 reduced the cycle-to-cycle input-output relationship between preBötC and the motor nucleus as  
227 revealed by examining the cycle-to-cycle I/O across preparations (**Fig 1D**, Baseline: 1.00  $\pm$  0.07  
228 vs. ChrMP459: 0.55  $\pm$  0.11; P=.006). In the extreme, altered input-output relationships between  
229 preBötC and the hypoglossal nucleus may increase the propensity for transmission failures as  
230 determined by the inability of preBötC activity to produce hypoglossal output at the network  
231 level<sup>31</sup>. Indeed, the reduced I/O ratio was associated with an increase in failed transmissions of

232 the preBötC activity to output from the hypoglossal nucleus (**Fig 1E**, Baseline:  $90.85 \pm 5.80\%$   
233 vs. ChrMP459:  $80.21 \pm 7.40\%$ ,  $P=0.039$ ). Together these findings suggest that HO inhibition  
234 causes a generalized weakening in the activity relationship between the rhythm generating  
235 network and hypoglossal motoneurons.

236 ChrMP459 is a pan HO inhibitor; however, it cannot distinguish activities between heme  
237 oxygenase isoforms. To assess the specific contribution of HO-2, we compared rhythmic  
238 activities in brain slices from wild type ( $n=9$ ) and HO-2 null ( $n=7$ ) mice (**Fig 2A**). Larger cycle-to-  
239 cycle I/O ratios were observed in wild type slices as compared to HO-2 null slices (**Fig 2B**: wild  
240 type:  $0.99 \pm 0.04$  vs. HO-2 null:  $0.76 \pm 0.11$ ,  $P=0.045$ ). Similarly, transmission of preBötC  
241 activity to the hypoglossal nucleus was greater in wild type than in HO-2 null slices (**Fig 2 C**,  
242 wild type:  $96.53 \pm 1.76\%$  vs. HO-2 null:  $62.55 \pm 7.93\%$ ,  $P=0.0006$ ). These findings established  
243 that genetic elimination of HO-2 produces a similar phenomenon to that of pan HO inhibition  
244 indicating that loss of HO-2 activity alone is sufficient for impairing transmission from the  
245 preBötC to the hypoglossal nucleus. Given these similarities and the limited availability of HO-2  
246 null mice, several of the following studies were performed using the ChrMP459 in rhythmic wild  
247 type brainstem slices.

248 ***HO inhibitor does not affect premotor neuron activity.*** Intermediary premotor neurons relay  
249 drive from the preBötC to the hypoglossal nucleus<sup>29,30</sup>. Therefore, it was possible that HO  
250 inhibition impaired transmission of drive from the preBötC by perturbing activity from  
251 intermediary premotor neurons. To address this possibility, triple extracellular recordings ( $n=5$ )  
252 were made from the preBötC, the field of the ipsilateral premotor neurons, and the hypoglossal  
253 nucleus. Baseline transmission from the preBötC to the premotor field and to the hypoglossal  
254 nucleus was reliable and consistent (**Fig. 3A, middle panel**). However, ChrMP459 disrupted  
255 activity in the hypoglossal nucleus despite unaltered activities in either the preBötC or the  
256 intermediate premotor field (**Fig 3A, right panel**). Indeed, while neither transmission failures nor

257 the cycle-to-cycle I/O ratio from the preBötC to the premotor field was affected by ChrMP459  
258 (**Fig 3B: left**; I/O: Baseline:  $1.16 \pm 0.09$  vs ChrMP  $1.16 \pm 0.14$ ,  $P=0.31$ ; **right**; Transmission:  
259 Baseline:  $100.0 \pm 0.0\%$  vs ChrMP  $86.35 \pm 11.81\%$ ,  $P=0.312$ ), the HO inhibitor reduced the  
260 transmission of activity and the cycle-to-cycle I/O ratio between the premotor field and the  
261 hypoglossal nucleus (**Fig 3C: left**, I/O: Baseline:  $1.12 \pm 0.17$  vs ChrMP  $0.40 \pm 0.09$ ,  $P=0.04$ ; **right**,  
262 Transmission: Baseline  $89.57 \pm 1.3\%$  vs ChrMP  $57.62 \pm 13.69\%$ ,  $P=0.04$ ). These results  
263 suggested that dysregulated HO-2 modulates is a postsynaptic phenomenon in the hypoglossal  
264 nucleus.

265 ***HO inhibition suppresses inspiratory drive currents and reduces excitability in***  
266 ***hypoglossal neurons.*** To examine the effect of HO inhibition on postsynaptic activity of the  
267 hypoglossal neurons, we performed patch clamp recordings from a total of 27 wild type  
268 hypoglossal neurons exposed to ChrMP459. These hypoglossal neurons were disinhibited from  
269 fast inhibition ( $50\mu\text{M}$  picrotoxin and  $1\mu\text{M}$  strychnine) allowing us to focus on inspiratory-related  
270 fast glutamatergic drive. 19 of the 27 hypoglossal neurons received excitatory synaptic drive in-  
271 phase with the preBötC (i.e., inspiratory hypoglossal neurons). Peak inspiratory drive currents  
272 were reduced in ChrMP459 (**Fig 4A**,  $n=19$ , Baseline:  $-142.9 \pm 22.82$  pA vs. ChrMP459:  $-95.31 \pm$   
273  $21.79$  pA,  $P=0.004$ ). Reduced drive coincided with hypoglossal neurons generating fewer  
274 action potentials per preBötC burst in ChrMP459 (**Fig 4B**,  $n=17$ , Baseline:  $14.68 \pm 2.23$  action  
275 potentials per burst vs. ChrMP459:  $6.79 \pm 1.54$  action potentials per burst,  $P<0.0001$ ).  
276 Furthermore, as determined by the injection of a depolarizing ramp current into hypoglossal  
277 neurons, the HO inhibitor increased rheobase among inspiratory hypoglossal neurons (**Fig 4C**,  
278  $n=19$ , Baseline:  $167.5 \pm 35.83$  pA vs. ChrMP459:  $338.0 \pm 82.50$  pA;  $P=0.008$ ) yet decreased  
279 rheobase in non-inspiratory hypoglossal neurons (i.e., neurons not receiving drive during  
280 preBötC activity; **Supplemental Fig 1**,  $n=8$ , Baseline:  $280.5 \pm 56.43$  pA vs  $228.2 \pm 47.96$  pA,  
281  $P=0.017$ ).

282 ***Elevated levels of H<sub>2</sub>S are observed in the hypoglossal nucleus of HO-2 null mice.*** We  
283 next sought to determine the mechanism(s) by which inhibition of HO-2 affect hypoglossal  
284 neuron activity. Earlier studies<sup>33,34</sup> have reported that HO-2 is a negative regulator of CSE-  
285 dependent H<sub>2</sub>S production. To test this possibility, we first examined whether the hypoglossal  
286 neurons express CSE. Brainstem sections from the wild type hypoglossal nucleus revealed  
287 CSE hypoglossal tissue punches from wild type and HO-2 null mice. Relative to the wild type  
288 hypoglossal nucleus, H<sub>2</sub>S is expressed in ChAT-positive hypoglossal neurons (**Fig 5A**, n=3).  
289 We then determined H<sub>2</sub>S abundance in hypoglossal tissue punches from wild type and HO-2  
290 null mice. Relative to the wild type hypoglossal nucleus (**Fig 5B blue**; n=6, 60.58 ±  
291 6.37 nmol • mg<sup>-1</sup> • h<sup>-1</sup>), H<sub>2</sub>S abundance was greater in the hypoglossal nucleus of HO-2 null  
292 mice (**Fig 5B red**; n=6, 144.12 ± 8.29 nmol • mg<sup>-1</sup> • h<sup>-1</sup>), but not different from the inferior olive  
293 brainstem region of HO-2 null mice (**Fig 5B grey**; n=4, 56.10 ± 2.88 nmol • mg<sup>-1</sup> • h<sup>-1</sup>). These  
294 findings suggest that the hypoglossal nucleus expresses CSE and HO-2 negatively regulates  
295 H<sub>2</sub>S production in the hypoglossal nucleus.

296 ***H<sub>2</sub>S mediates impaired transmission of inspiratory drive caused by disrupted HO-2***  
297 ***function.***

298 If the impaired transmission of inspiratory drive to the hypoglossal nucleus by disrupted HO-2  
299 function involves CSE-derived H<sub>2</sub>S then: 1) a H<sub>2</sub>S donor should mimic the effects of disrupted  
300 HO-2 activity; 2) CO administration should improve the input-output relationship in respiratory  
301 slices from HO-2 null mice and ChrM459 application; and 3) CSE blockade should restore the  
302 transmission from the preBötC to the hypoglossal nucleus. The following experiments tested  
303 these possibilities.

304 Wild type brainstem slices exhibited a nearly 1:1 ratio of transmission of inspiratory activity from  
305 preBötC to hypoglossal neurons (**Fig 5C, left**). Application of NaHS, a H<sub>2</sub>S donor reduced  
306 transmission from preBötC to hypoglossal (**Fig. 5C, middle, right**) in a dose-dependent manner  
307 (**Fig. 5D**; 0μM NaHS: n=9, 100 ± 0.73%; 10μM NaHS: n=5, 90.14 ± 6.08%; 50μM NaHS: n=6,

308 84.0 ± 3.91%; 100µM NaHS: n=9, 81.2 ± 5.83%), which coincided with a reduction in I/O ratio  
309 by NaHS (**Fig. 5E**; 0 µM NaHS: 1.055 ± 0.028; 10µM NaHS: 0.85 ± 0.09; 50µM NaHS: 0.82 ±  
310 0.08; 100µM NaHS: 0.84 ± 0.07). These findings demonstrated increased H<sub>2</sub>S abundance  
311 reduces hypoglossal neuronal activity consistent with findings using either ChrM459 or HO-2  
312 null mice. Thus, the stability of inspiratory transmission from the preBötC to hypoglossal nucleus  
313 appears to be negatively affected either by increasing H<sub>2</sub>S abundance or by disrupting HO-2  
314 function.

315 CO produced by HO-2 is known to inhibit CSE-dependent H<sub>2</sub>S production by HO-2<sup>33,34</sup>.  
316 Therefore, we sought to assess how CORM-3 (20µM), a pharmacological CO donor, impacted  
317 activity in ChrMP459-treated wild type rhythmic slices (n= 3, **Fig 6A**) and rhythmic slices from  
318 HO-2 null mice (n=4). Dysregulated HO-2 activity, caused by either pharmacological  
319 (ChrMP459) or genetic (HO-2 null mice) manipulation, is improved by CORM-3 as indicated by  
320 larger I/O ratios (**Fig 6B**, dysregulated HO-2: 0.71 ± 0.04 vs. CORM-3: 1.03 ± 0.08, P=0.009)  
321 and improved transmission (**Fig 6C**, dysregulated HO-2: 79.88 ± 4.69% vs. CORM-3:  
322 93.39 ± 2.93%, P=0.036). As these findings suggested the absence of HO-2 dependent CO  
323 production is a key factor driving transmission failure in the rhythmic slice preparation, we next  
324 determined the involvement of CSE.

325 Inspiratory activity in the brainstem slice from HO-2:CSE double null mice appeared to be stable  
326 and consistent (**Fig 6D**). Quantification of simultaneous extracellular field recordings of preBötC  
327 activity and hypoglossal nucleus revealed a larger I/O ratio (**Fig 6E**, HO-2:CSE: 1.04 ± 0.02,  
328 n=6; P=0.003) and near absence of transmission failures (**Fig 6F**, HO-2:CSE: 91.6 ± 0.02%;  
329 P=0.0007) when compared to activity in HO-2 null slices.

330 Given the observations using HO-2:CSE null mice, we next sought to determine whether acute  
331 blockade of CSE could restore transmission relationships between the preBötC and the  
332 hypoglossal nucleus in the HO-2 null slice. *In vivo* L-PAG treatment improved transmission of  
333 preBötC activity to the hypoglossal nucleus in the rhythmic slice (**Fig. 7A**, n=6) as indicated by

334 larger cycle-to-cycle I/O ratios (**Fig. 7B**, L-PAG =  $1.01 \pm 0.03$ ,  $P=0.008$ ) and greater transmission  
335 rates (**Fig. 7C**, L-PAG  $96.31 \pm 2.62\%$ ,  $P<0.0001$ ) when compared to the respective metrics from  
336 untreated HO-2 null mice. Intermittent transmission failure was also evident in patch clamp  
337 recordings from untreated HO-2 null hypoglossal neurons (**Fig 7D**, *left shaded cycles*) but not in  
338 HO-2 null hypoglossal neurons treated with L-PAG (**Fig. 7D**, *right*). These reduced transmission  
339 events correlated with smaller individual inspiratory drive currents in HO-2 null hypoglossal  
340 neurons when compared to corresponding inspiratory drive currents from L-PAG treated HO-2  
341 mice (**Fig. 7D-E**, HO-2:  $-36.71$   
342  $\pm 2.14$  pA vs. L-PAG  $-194.3 \pm 82.73$  pA,  $P=0.0007$ ). Together, these experiments implicated  
343 the involvement of CSE-dependent H<sub>2</sub>S signaling with the effects of disrupted HO-2 signaling in  
344 hypoglossal neurons.

345 ***Blockade of small conductance calcium-activated potassium channel (SK<sub>Ca</sub>) activity***  
346 ***restores changes induced by HO-dysregulation in hypoglossal activity.*** As our  
347 experiments implicated the involvement of H<sub>2</sub>S signaling, we next sought to determine how H<sub>2</sub>S  
348 sensitive ion channels may contribute to impairing hypoglossal neuron activity caused by  
349 HO-dysregulation. H<sub>2</sub>S has been shown to enhance activity of several different potassium  
350 channels, including SK<sub>Ca</sub> and ATP-sensitive potassium channel (K<sub>ATP</sub>) activities<sup>35</sup>. As both SK<sub>Ca</sub>  
351 and K<sub>ATP</sub> are important in the regulation of hypoglossal neuron excitability<sup>36,37</sup>, we examined  
352 how blocking these channels affected hypoglossal activity during HO-dysregulation. At the  
353 network level, administration of the selective SK<sub>Ca</sub> inhibitor, apamin (200μM), increased the  
354 excitability of the hypoglossal neurons treated with ChrMP459. This enhanced activity exceeded  
355 the original baseline activity (i.e., prior to ChrMP459 administration) causing ectopic bursting in  
356 the hypoglossal nucleus (**Supplemental Figure 2A**) making analysis of population transmission  
357 and I/O ratios unreliable. Therefore, we proceeded to resolve the effects of apamin on the  
358 influence of ChrMP459 at the level of individual hypoglossal inspiratory motor neurons. While in  
359 some hypoglossal neurons exposed to ChrMP459 apamin substantially increased drive currents

360 (>100pA; **FIG 8A1**), in others, apamin modestly increased the drive current (<100pA; **FIG 8A2**).  
361 Despite this variability, apamin increased inspiratory drive currents received by ChrMP459  
362 treated hypoglossal neurons (**FIG 8A3**, n= 6, ChrMP459:  $-85.77 \pm 38.54$  pA vs. apamin: -  
363  $219.97 \pm 97.76$  pA,  $P=0.031$ ). Apamin also enhanced the number of action potential generated  
364 per preBötC burst during ChrMP459 (**FIG 8B**, n=8, ChrMP-459:  $12.57 \pm 3.7$  action potential per  
365 burst vs. apamin  $26.05 \pm 6.87$  action potential per burst,  $P=0.016$ ). This was consistent with the  
366 ability of apamin to reduce rheobase in ChrMP459 treated inspiratory hypoglossal neurons (**FIG**  
367 **8B**; n=7, ChrMP459:  $532.0 \pm 186.5$  pA vs. Apamin:  $307.09 \pm 80.9$  pA,  $P=0.016$ ).  
368 To determine how blockade of  $K_{ATP}$  impacted hypoglossal activity during ChrMP459, we used  
369 the  $K_{ATP}$  channel blocker, tolbutamide (100 $\mu$ M). Tolbutamide did not induce ectopic bursting in  
370 the hypoglossal nucleus during ChrMP459 (**Supplemental Fig 2B**, n=5). Furthermore,  
371 tolbutamide (100 $\mu$ M), did not improve the rate of transmission of preBötC activity  
372 (**Supplemental Fig 2C**, ChrMP459:  $69.24 \pm 6.0\%$  tolbutamide:  $71.23 \pm 6.8\%$ ,  $P=0.76$ ) but did  
373 increase the I/O ratio (**Supplemental Fig 2C right**, ChrMP459:  $0.68 \pm 0.05$  tolbutamide:  
374  $0.87 \pm 0.05$ ,  $P=0.037$ ). Tolbutamide neither enhanced inspiratory drive currents in ChrMP459  
375 (**Supplemental Fig 2D**, n=4, ChrMP459:  $-70.51 \pm 27.49$  pA vs. tolbutamide:  $-83.06 \pm 36.29$  pA,  
376  $P=0.37$ ) nor increased the number of action potentials per preBötC burst in ChrMP459 (n=4,  
377 ChrMP459:  $7.063 \pm 2.08$  action potential per burst vs. tolbutamide:  $9.37 \pm 3.18$  action potential  
378 per burst,  $P=0.125$ ). Moreover, tolbutamide did not affect rheobase of inspiratory hypoglossal  
379 neurons treated with ChrMP459 (**Supplemental Fig 2D**, n=4; ChrMP459:  $221.01 \pm 74.8$  pA vs.  
380 tolbutamide:  $180.4 \pm 68.63$  pA,  $P=0.218$ ). Thus, these results suggested that apamin could  
381 enhance activity of hypoglossal neurons during HO-inhibition; whereas, the efficacy of  
382 tolbutamide to impact activity during HO-inhibition was limited.



383 **Discussion**

384 Our study reveals a previously uncharacterized neuromodulatory interaction between HO-2 and  
385 CSE-derived H<sub>2</sub>S regulating activity from the hypoglossal nucleus. Our electrophysiological  
386 studies revealed that dysregulated HO-2 activity impacted intrinsic properties of hypoglossal  
387 neurons receiving drive from the preBötC. HO-2 dysregulation impaired transmission originating  
388 from the rhythm generating preBötC and the motor nucleus, as evidenced by the cycle-to-cycle  
389 reductions in the input-output relationship and the intermittent failures for preBötC activity to  
390 generate corresponding motor pool output, which mitigated blocking CSE activity and mimicked  
391 using a H<sub>2</sub>S donor. The increased propensity of transmission failure in response to  
392 dysregulated HO-2 activity and involvement of CSE / H<sub>2</sub>S are reminiscent of the OSA  
393 phenotypes observed in HO-2 null mice<sup>16</sup>. Thus, our study demonstrates the potential  
394 importance of centrally derived interactions between HO-2 and CSE activity in regulating motor  
395 neuron output important for maintaining upper airway patency.

396 Both a pharmacological inhibitor of HO and genetic elimination of Hmox-2 impaired transmission  
397 of neural drive from preBötC to the hypoglossal nucleus. Mice treated with intermittent hypoxia  
398 (IH) patterned after blood O<sub>2</sub> profiles seen during OSA also show failed transmission related to a  
399 changed input-output relationship between preBötC and hypoglossal nucleus<sup>31, 38</sup>. While IH-  
400 induced phenomena are associated with alterations in preBötC activity, the HO inhibitor neither  
401 impacted inspiratory rhythmogenesis from the preBötC (**Fig. 1C**) nor perturbed transmission of  
402 neuronal drive to intermediate premotor neurons suggesting that changed interneuron  
403 neurophysiology was not a major contributing factor to the impaired transmission in the  
404 hypoglossal nucleus.

405 At the level of the hypoglossal nucleus, we documented that HO-2 is expressed among ChAT-  
406 positive cells of the hypoglossal nucleus. Although we did not resolve expression among  
407 hypoglossal motor neurons innervating upper airway muscles, such as genioglossal neurons,  
408 our electrophysiological studies demonstrated that ChrMP459 had divergent effects on non-

409 inspiratory and inspiratory hypoglossal neurons. HO inhibition increased rheobase among non-  
410 inspiratory neurons; whereas, in inspiratory hypoglossal neurons, it decreased the magnitude of  
411 drive currents, increased rheobase, and diminished the number of action potentials generated  
412 during preBötC bursting. Thus, while our studies did not resolve how hypoglossal neurons  
413 projecting to different tongue muscles are impacted by ChrMP459, our findings indicate that  
414 HO-dysregulation can differentially impact hypoglossal neurons that receive drive from the  
415 preBötC.

416 The observed postsynaptic phenomena among hypoglossal motor neurons receiving inspiratory  
417 drive could contribute to the occurrence of obstructive apneas by increasing the probability for  
418 intermittent reductions in upper airway tone from inspiratory drive by hypoglossal motor  
419 neurons. Such loss of upper airway muscle tone can obstruct airflow even when inspiratory  
420 activity is successfully produced at in other inspiratory muscles, such as the diaphragm. Indeed,  
421 this phenotype has been documented in HO-2 null mice<sup>16</sup>. However, further resolution is  
422 needed to understand how dysregulation of HO-2 may impact hypoglossal neurons innervating  
423 different muscle groups and to determine extent of the contribution from central HO-2  
424 dysregulation to loss of upper airway tone and airway collapse *in vivo*.

425 In HO-2 null mouse, the incidence of OSA is absent with co-inhibition of CSE<sup>17</sup>, which is  
426 consistent with reports that CO generated by HO-2 inhibits CSE-dependent H<sub>2</sub>S production<sup>33,34</sup>.  
427 After documenting CSE expression in hypoglossal neurons and demonstrating an increased  
428 abundance of H<sub>2</sub>S in the hypoglossal nucleus of HO-2 null mice, we demonstrated that a CO  
429 donor improves transmission and the input-output relationship between the preBötC and the  
430 hypoglossal nucleus in HO-2 null slices. Furthermore, using a H<sub>2</sub>S donor also increased  
431 transmission failures and reduced the I/O ratio similar to perturbing HO-2 activity. Endogenous  
432 H<sub>2</sub>S activity could originate from other H<sub>2</sub>S producing enzymes, such as cystathionone  $\beta$ -  
433 synthase (CBS) that is expressed primarily in astrocytes throughout the CNS<sup>39</sup>. However, CBS  
434 inhibition appears to have limited impact on inspiratory activity from the hypoglossal nucleus<sup>40</sup>.

435 In contrast, our genetic and pharmacological manipulations to ablate/diminish CSE activity  
436 improved transmission and the input-output relationship between inspiratory drive and the  
437 hypoglossal nucleus in HO-2 null mice. Together these findings implicated the interaction  
438 between HO-2 / CO and CSE / H<sub>2</sub>S within the hypoglossal nucleus to regulate its output.

439 How might enhanced H<sub>2</sub>S signaling reduce drive currents, and excitability of hypoglossal  
440 neurons? While it is possible that H<sub>2</sub>S may impact presynaptic release of glutamate and/or  
441 postsynaptic receptor activity of hypoglossal neurons, the ChrMP459 mediated increase in  
442 rheobase among inspiratory hypoglossal neurons implicated the involvement of a non-synaptic  
443 conductance(s) downstream of H<sub>2</sub>S based signaling caused by perturbations in HO-2 activity.  
444 H<sub>2</sub>S can enhance both K<sub>ATP</sub> and SK<sub>Ca</sub> activities<sup>35</sup>. In the hypoglossal neurons, K<sub>ATP</sub> is  
445 dynamically active causing periodic adjustment of neuronal excitability<sup>36</sup> while SK<sub>Ca</sub> also  
446 regulates excitability and firing properties of hypoglossal neurons<sup>37</sup>. In ChrMP459, tolbutamide  
447 had a limited effect normalizing transmission as it improved the I/O ratio between preBötC and  
448 the hypoglossal motor nucleus, but did not reduce transmission failure. At the neuronal level,  
449 tolbutamide did not increase drive currents nor did it enhance intrinsic excitability of hypoglossal  
450 neurons in ChrMP459. These results indicated that blockade of K<sub>ATP</sub> during HO-2 dysregulation  
451 was limited in countering the effects on HO-2 dysregulation in the hypoglossal nucleus. On the  
452 other hand, apamin normalized drive currents and increased excitability of inspiratory  
453 hypoglossal neurons in ChrMP459 demonstrating that blockade of SK<sub>Ca</sub> sufficiently mitigates  
454 many aspects of HO-2 dysregulation in hypoglossal neurons that receive drive from the  
455 preBötC.

456 In conclusion, our study provides proof-of-concept for the existence of a central  
457 mechanism by which loss of HO-2 leads to reduced upper airway tone by enhancing H<sub>2</sub>S  
458 activity in the hypoglossal nucleus. This mechanism appears to involve antagonistic interactions  
459 between HO-2 and CSE activities to regulate excitability of hypoglossal neurons and is localized  
460 in the neurons themselves. Although OSA in HO-2 null mice has attributed to increased “loop-

461 gain” arising from the hypersensitive carotid body reflex<sup>16</sup>, our findings indicate the potential  
462 involvement of a disrupted interaction between HO-2 / CO and CSE / H<sub>2</sub>S in hypoglossal motor  
463 neurons that contribute could to the sporadic loss of upper airway tone observed in OSA.

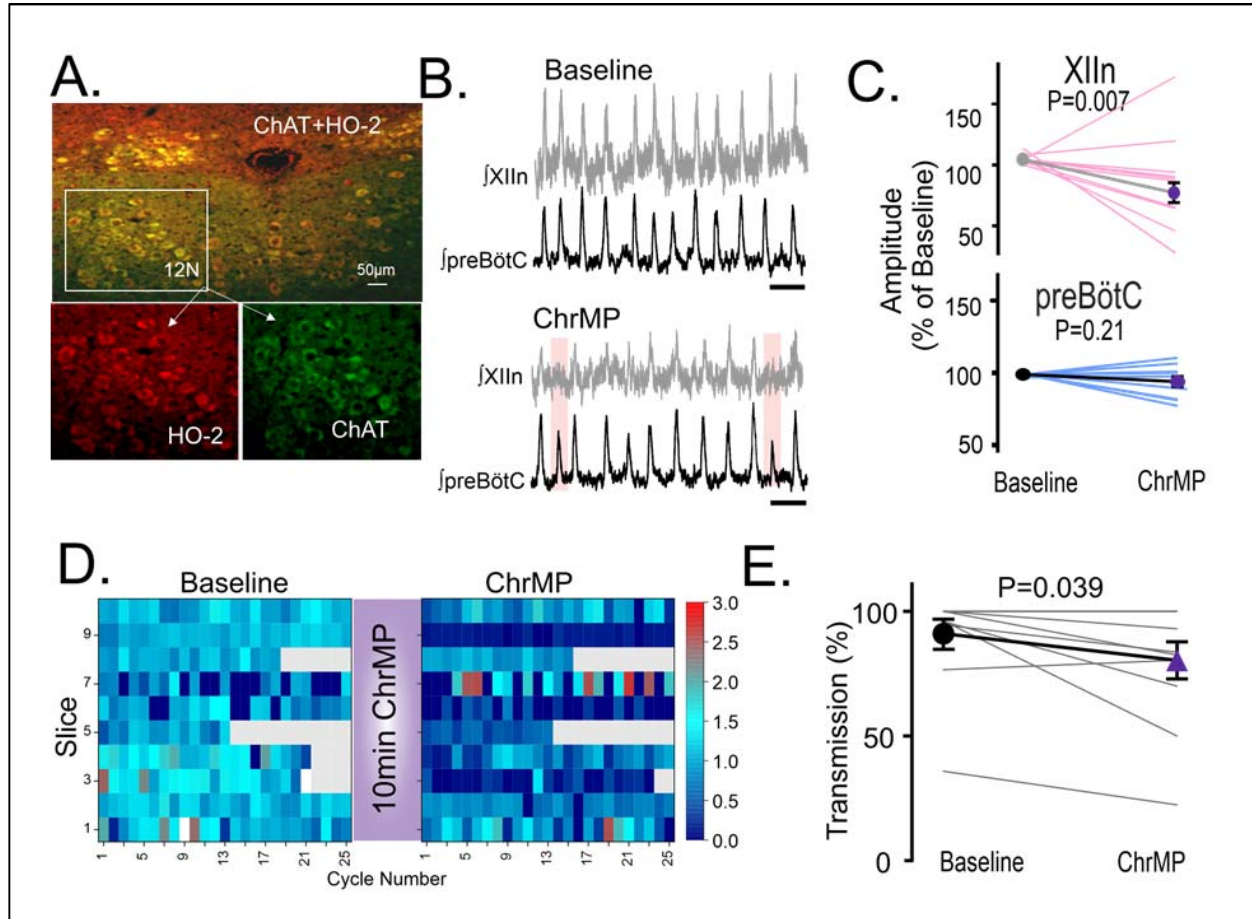

464

465 **Figure 1. Disruption of hemeoxygenase-2 (HO-2) in hypoglossal motor neurons impairs**  
466 **inspiratory activity from the hypoglossal nucleus but not in the preBötC.** **A.** HO-2 (red  
467 bottom left) is expressed in ChAT<sup>+</sup> cells (green bottom right) of the hypoglossal nucleus (XIIIn,  
468 combined top). **B-E.** Population recordings of rhythmic brain slices were recorded from  
469 ipsilateral preBotC and XIIIn simultaneously, analyses were performed during baseline and  
470 during bath application of 20 $\mu$ M ChrMP459 (ChrMP). **B.** Integrated traces of network activity in  
471 spontaneously rhythmic brainstem slices (n=11) recorded from XIIIn (grey) and preBötC (black)  
472 before (top) and after (bottom) bath application, failed transmission events are highlighted (pink  
473 boxes); scale bar: 5 sec. **C.** Percentage change of integrated burst amplitude from Baseline to  
474 ChrMP in XIIIn (top) and the preBötC (bottom). Thin pink and blue lines illustrate integrated burst

475 amplitude from individual slices. Symbols connected by a thick line illustrate mean integrated  
476 burst amplitude. **D.** Heat maps of consecutive cycle-to-cycle I/O ratios in Baseline and in  
477 ChrMP. Each row represents a single slice experiment during baseline and in ChrMP. Grey  
478 boxes indicate non-events in recordings from slower rhythms where less than 25 events (i.e., 25  
479 cycles) occurred during the analysis window. **E.** Comparison of inspiratory drive transmission in  
480 XIIIn between Baseline and ChrMP. Thin grey lines illustrate transmission from individual slices.  
481 Symbols connected by a thick line illustrate mean transmission.

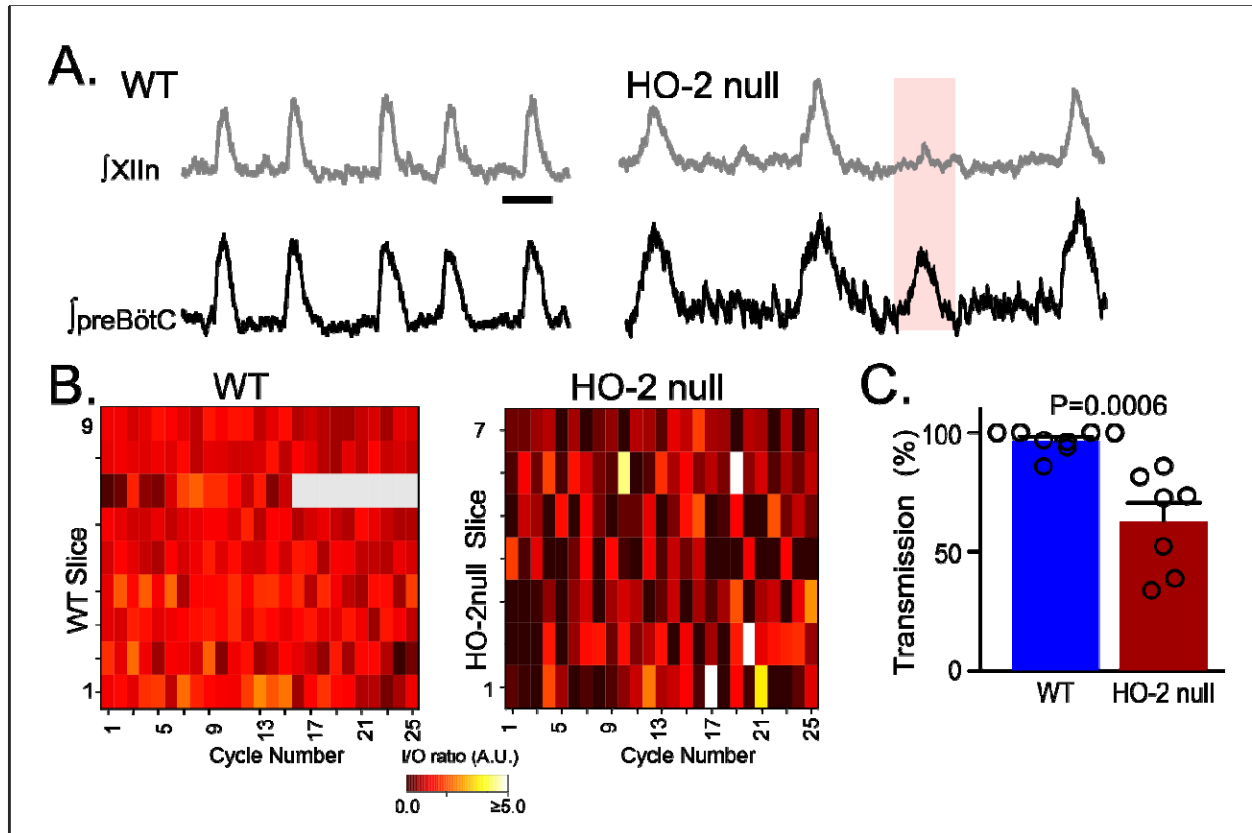

482

483 **Figure 2. Genetic deletion of HO-2 reduces the I/O relationship between preBötC and the**  
484 **hypoglossal nucleus and uncouples of motor output from inspiratory rhythmogenesis.**

485 **A.** Representative integrated traces of network burst activity in the preBötC and XIIIn in rhythmic  
486 slices from wildtype (WT) (left, n=9) and HO-2 null (HO-2<sup>-/-</sup>; right, n=7) mice; scale bar: 2 sec. **B.**  
487 Heat maps of cycle-to-cycle I/O ratios in WT (left) and HO-2<sup>-/-</sup> (right) slices. Grey boxes indicate  
488 non-events in recordings from slower rhythms where less than 25 events occurred during the  
489 analysis window. **C.** Transmission of inspiratory activity from preBötC to XIIIn in slices from WT  
490 vs HO-2<sup>-/-</sup>. Symbols illustrate transmission from individual slices.

491

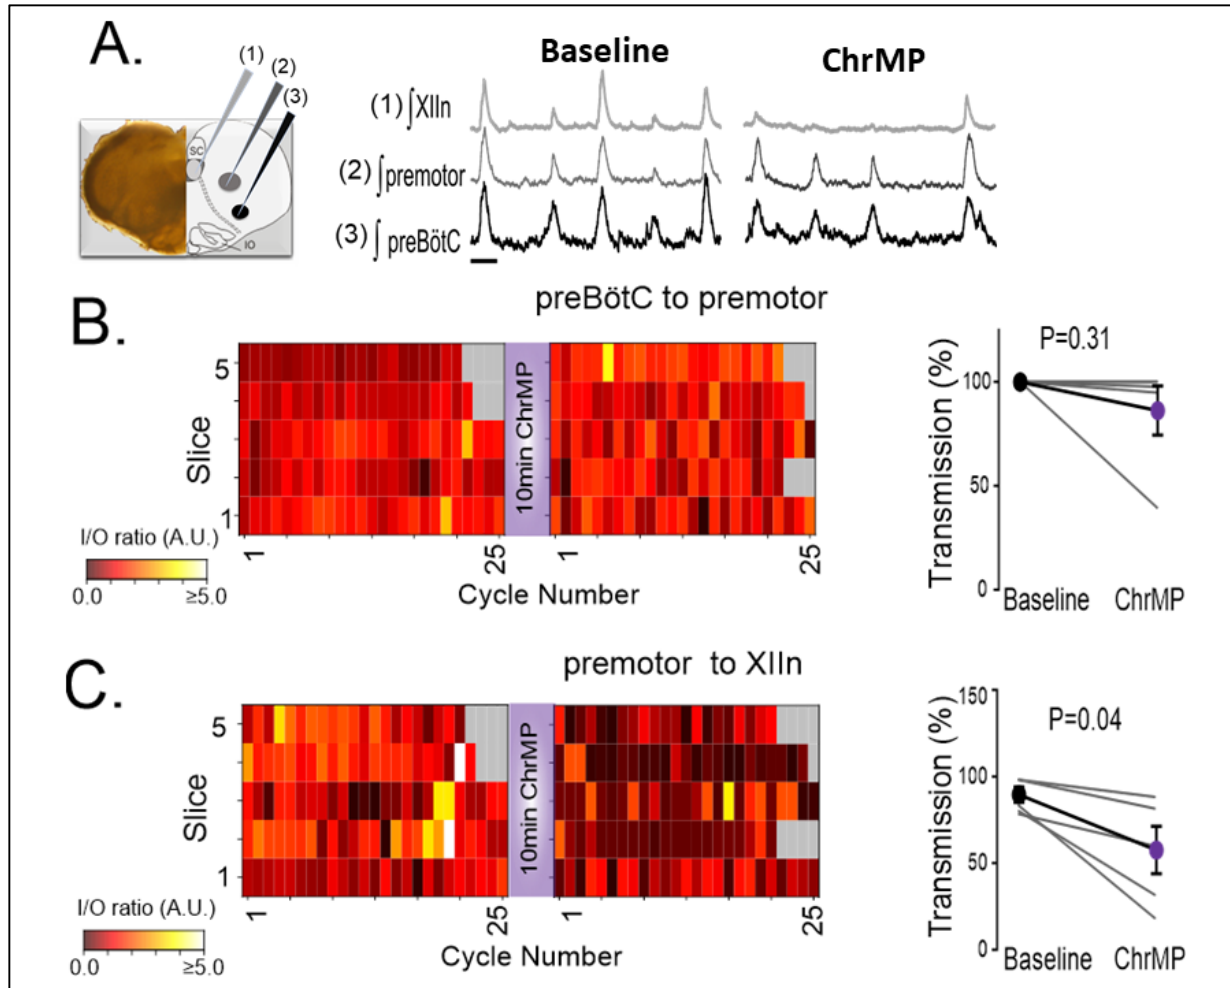

492

493 **Figure 3. While ChrMP459 does not change transmission from the preBötC to the**  
494 **premotor area, ChrMP459 increases transmission failure from the premotor area to the**  
495 **hypoglossal nucleus.** **A.** Diagram of medullary brain slice illustrating relative electrode  
496 placement for simultaneous triple extracellular recordings (n=5) from the XIlIn (light grey, 1),  
497 premotor field (dark grey, 2), and preBötC (black, 3). Corresponding representative traces of  
498 integrated network activity in Baseline (left) and in 20 $\mu$ M ChrMP (right); scale bar: 1 sec. **B.**  
499 Heat maps of the cycle to cycle I/O ratio (left) and transmission (right) between preBötC and the  
500 premotor field. **C.** Heat maps of the cycle to cycle I/O ratio (left) and transmission (right)  
501 between the premotor field and XIlIn.



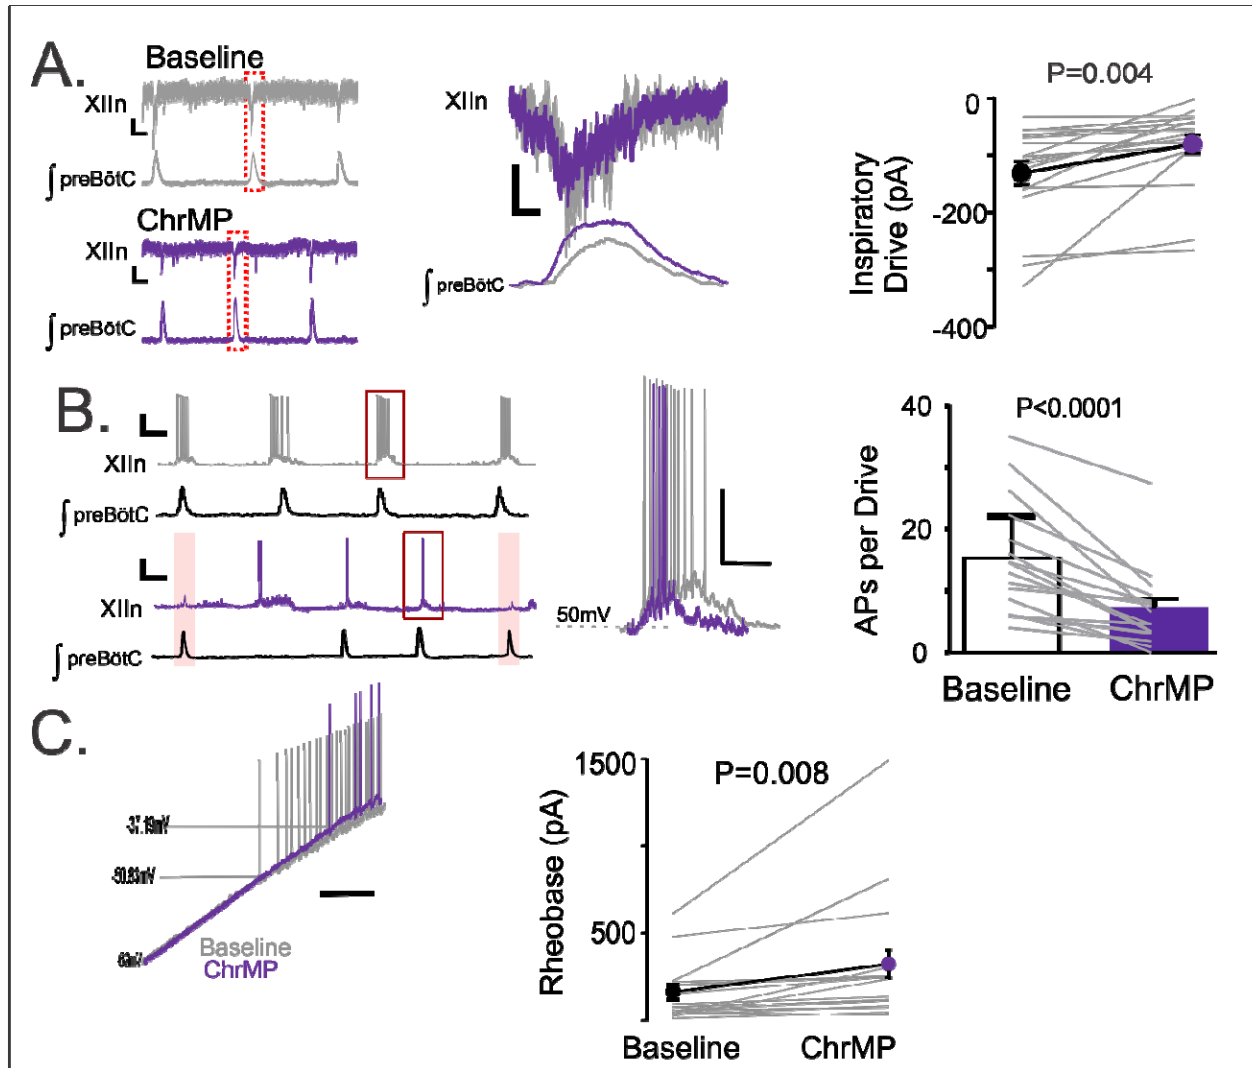

502 **Figure 4. Heme oxygenase inhibition reduces inspiratory drive currents in hypoglossal**  
503 **neurons.** Whole cell patch clamp recordings were made from hypoglossal neurons in rhythmic  
504 brain slices while simultaneously recording ipsilateral preBötC activity in Baseline and in ChrMP.  
505 Neurons were disinhibited from fast synaptic inhibition using 50 $\mu$ M PTX and 1 $\mu$ M Strychnine.  
506 **A.** (left) Representative voltage clamp recordings from a XIIIn neuron ( $V_{\text{holding}} = -60\text{mV}$ ) aligned  
507 with corresponding integrated network activity from preBötC before (Baseline, top, grey) and  
508 after 20  $\mu$ M ChrMP (bottom, purple). Scale bar: 1 sec x 10pA. (middle) Magnification of  
509 highlighted (red dotted box) drive currents from Baseline (grey) and ChrMP (purple). Scale bar:  
510 100 msec x 10pA. (right) Comparison of XIIIn inspiratory drive current magnitude in Baseline and

511 ChrMP (n=19). Thin grey lines illustrate individual neuron response. Symbols connected by a  
512 thick line illustrate mean drive current. **B.** (left) Representative current clamp recordings from a  
513 XIIIn neuron spontaneously active with the preBötC network rhythm in Baseline (top, grey) and  
514 20  $\mu$ M ChrMP (bottom, purple); skipped transmission of action potentials in ChrMP are  
515 highlighted (pink). Scale bar 2sec x 20mV. (middle) Magnification of highlighted neuronal activity  
516 (red box in left). Scale bars: 100msec x 25mV. (right) Number of action potentials generated  
517 per inspiratory burst in Baseline and in ChrMP (n=17). Thin grey lines illustrate individual neuron  
518 response. **C.** (left) Representative trace of current clamp recording in response to ramp current  
519 injection during Baseline (grey trace) and in ChrMP (purple trace); scale bar: 500 msec. (right)  
520 Comparison of rheobase in inspiratory XIIIn neurons during Baseline and in ChrMP (n=19). Thin  
521 grey lines illustrate individual neuron response.

522

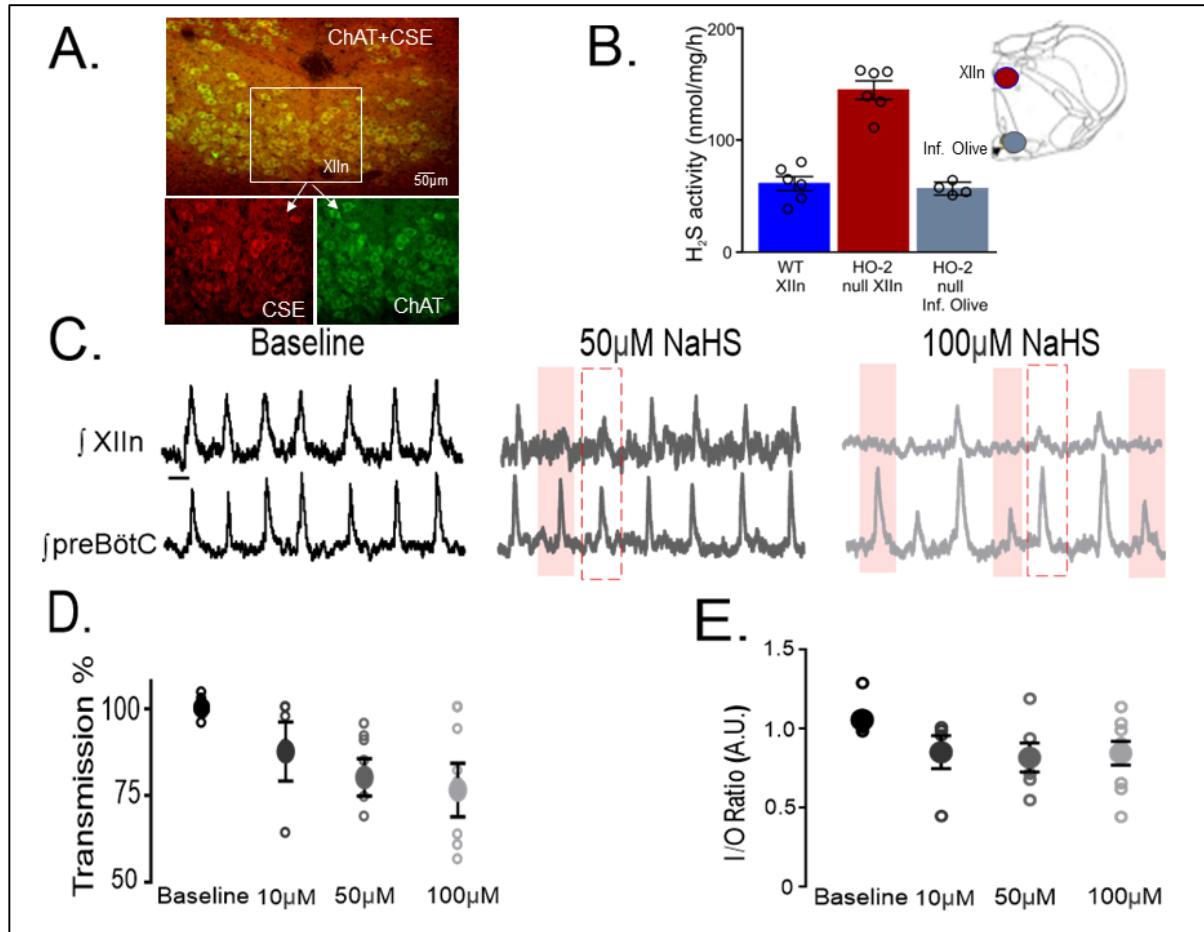

523

524 **Figure 5. CSE-dependent H<sub>2</sub>S is produced in the hypoglossal nucleus and exogenous**

525 **NaHS uncouples hypoglossal nucleus activity from the preBötC. A.** CSE (red, bottom left)

526 is expressed in ChAT<sup>+</sup> neurons (green, bottom right) in the XIIIn (overlay, top). **B.** CSE-

527 dependent H<sub>2</sub>S generation in homogenates from WT and HO-2<sup>-/-</sup>. Homogenates were prepared

528 from tissue punches from the XIIIn (red area in slice diagram) and inferior olive (grey area in

529 slice diagram) at bregma between -7.20mm and -7.90mm. (WT: XIIIn n=6; HO-2<sup>-/-</sup>: XIIIn n=6,

530 inferior olive n=4). Note: Each n value reported in B represents a sample consisting of the

531 anatomical region pooled from two animals. **C.** Integrated traces from XIIIn (top) and preBötC

532 (bottom) during baseline (black), and in response to the H<sub>2</sub>S donor, NaHS, at 50 μM (dark grey)

533 and 100 μM (light grey). After NaHS application, XIIIn but not preBötC burst amplitude were

534 diminished (red dashed box) and in some cases, preBötC drive failed to produce activity in the

535 XIn (pink boxes). **D.** Comparison of transmission from preBötC to XIn after NaHS application at  
536 10 $\mu$ M, 50 $\mu$ M and 100 $\mu$ M. **E.** I/O ratios for each NaHS concentration. (Baseline: n=9; 10 $\mu$ M n=5;  
537 50 $\mu$ M n=6; 100 $\mu$ M n=9).

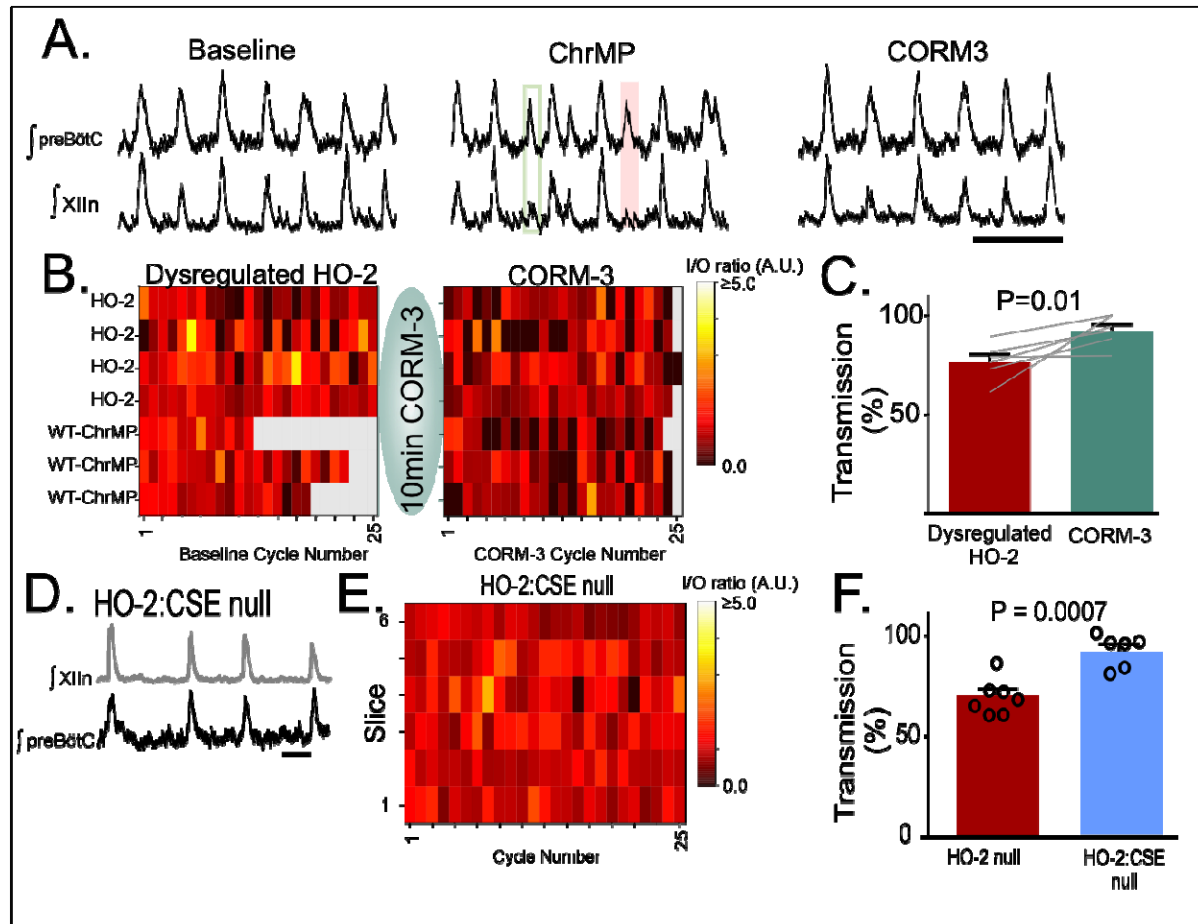

538 **Figure 6. HO-dependent transmission failures can be recovered with CO-donor CORM-3**  
 539 **and are not present in HO-2:CSE null transmission.** **A.** Representative extracellular  
 540 recording from preBotC and XIn in WT slices during Baseline (left), in ChrMP alone (middle),  
 541 and in ChrMP + 20uM CORM-3 (CORM3, right). **B.** Heat maps of cycle-to-cycle I/O ratios  
 542 during dysregulated HO-2 (n=7: n=4 HO-2 null and n=3 WT-ChrMP) before and after CORM-3  
 543 application. **C.** Transmission from preBotC to XIn from dysregulated HO-2 slices before and  
 544 after bath application of CORM-3. **D.** Representative extracellular recordings from preBotC and  
 545 XIn in slices from HO-2:CSE null (HO-2:CSE<sup>-/-</sup>); scale bar 2 sec. **E.** Heat map of cycle-to-cycle  
 546 I/O ratio from preBotC to XIn in HO-2:CSE<sup>-/-</sup>. The I/O ratio from HO-2:CSE<sup>-/-</sup> is greater than I/O  
 547 ratios from HO-2<sup>-/-</sup> (P=0.003). **F.** Comparison of transmission from preBotC to XIn in HO-2<sup>-/-</sup>

548 and HO-2:CSE<sup>-/-</sup> (n=6). HO-2<sup>-/-</sup> data used for comparisons in E and F were originally shown in  
549 Figure 2.

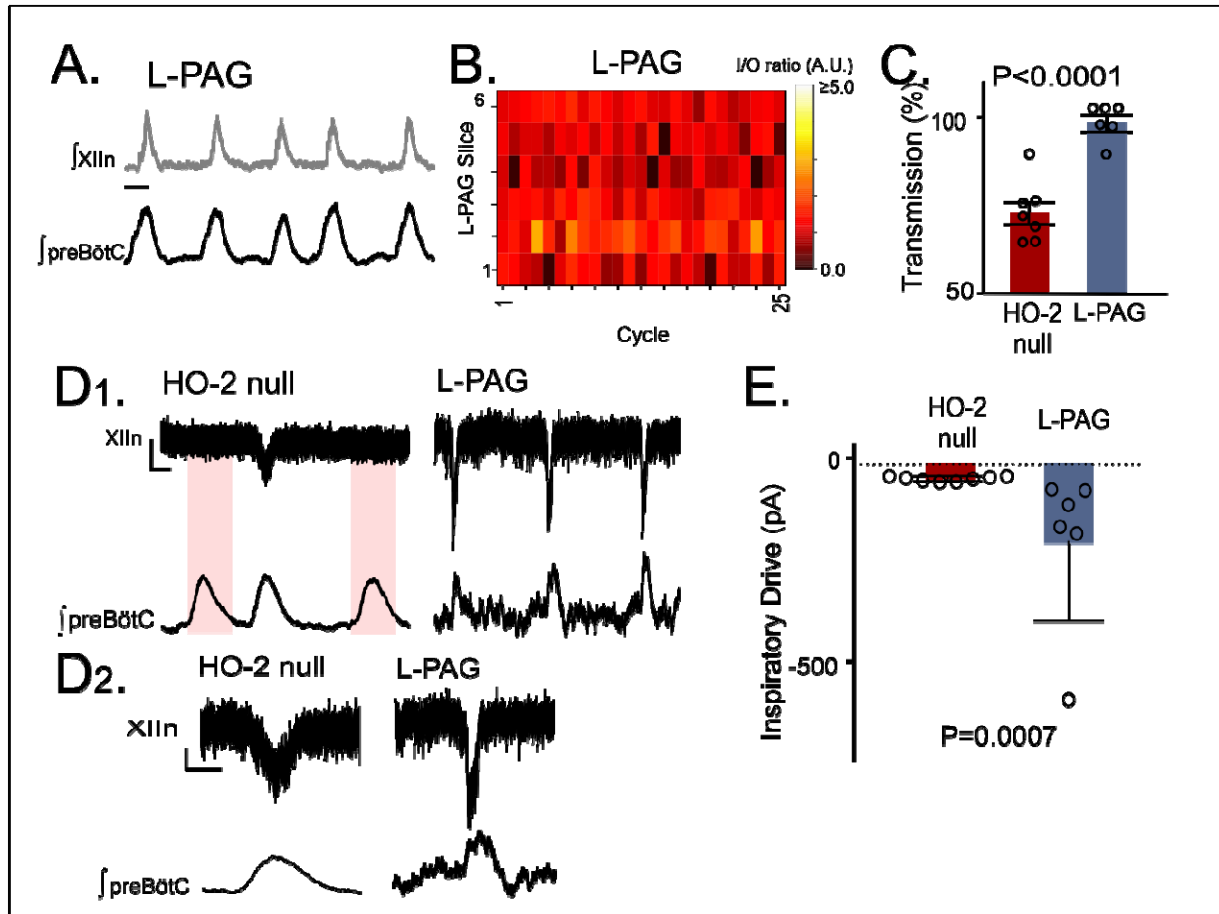

550  
551 **Figure 7. Transmission failures in HO-2 null mice are rescued with CSE inhibitor L-**  
552 **propargylglycine.** **A.** Representative recordings of integrated activity of the preBötC (bottom)  
553 and XIIIn (top) in slices from HO-2 null mice treated with L-PAG (30mg/kg; L-PAG, n=5). Scale  
554 bar 2 sec. **B.** Heat map of cycle-to-cycle I/O ratio in rhythmic slices from HO-2 null mice treated  
555 with L-PAG (n=6). **C.** Comparison of transmission between HO-2<sup>-/-</sup> (replotted from Fig 2) and L-  
556 PAG slices (n=6). **D.** Representative voltage clamp recordings of inspiratory drive currents  
557 received by hypoglossal neurons from HO-2<sup>-/-</sup> (n=7) and L-PAG (n=6). Neurons were  
558 disinhibited from fast synaptic inhibition using 50μM PTX and 1μM Strychnine. Scale bar 10  
559 msec x 20pA. Skipped transmission between preBötC (bottom) the XIIIn neuron (top) occurs in

560 untreated HO-2<sup>-/-</sup> (highlighted by pink boxes) but not in neurons from L-PAG. **D1.**  
561 Magnified representative drive potentials from HO-2<sup>-/-</sup> and L-PAG (from highlighted by red-  
562 outlined boxes in **D**). scale bars: 100 msec x 10pA. **E.** Quantification of drive currents received  
563 by XIIIn motoneurons from HO-2<sup>-/-</sup> mice (n=8) produce smaller drive potentials when compared  
564 to L-PAG (n=6).

565

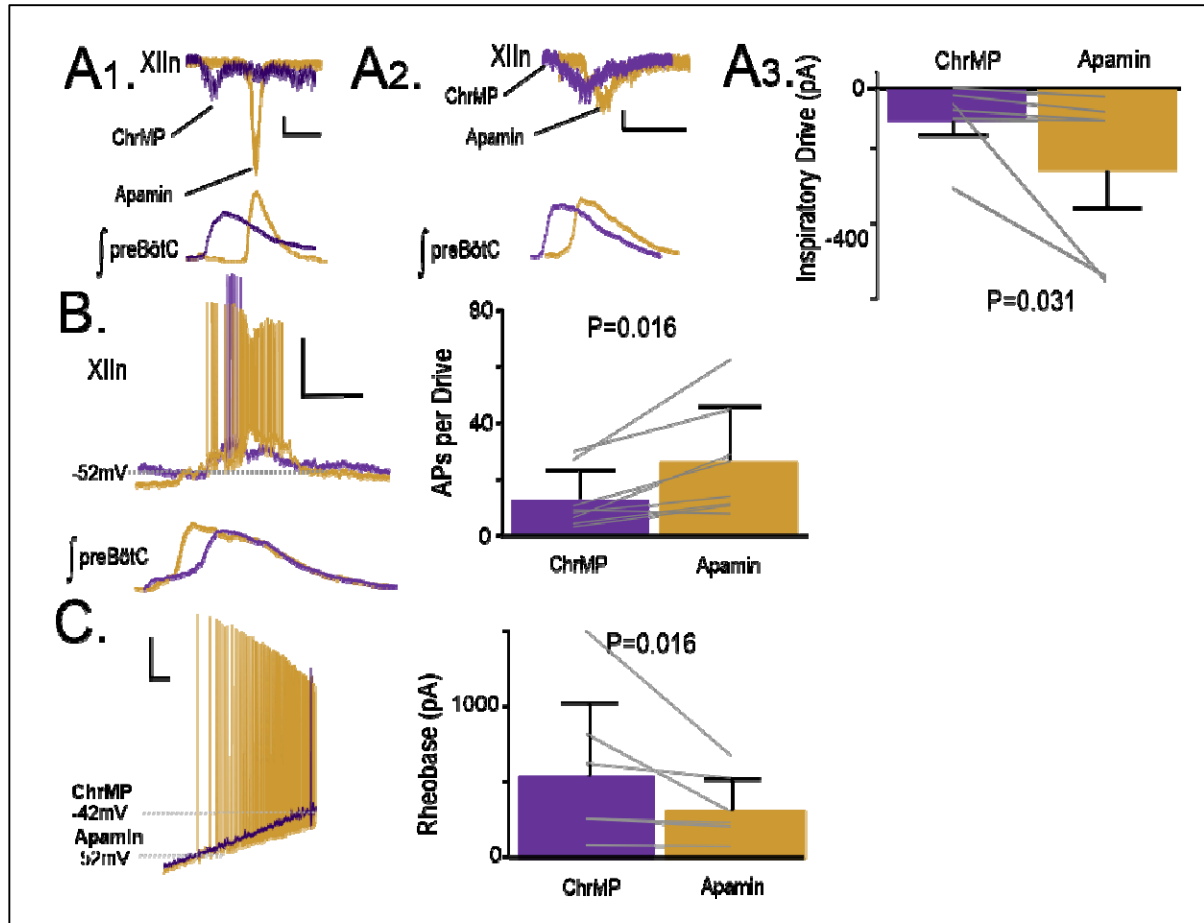

566

567 **Figure 8. Apamin improves network input-output relationship between hypoglossal**  
568 **nucleus and reverses changes to intrinsic and synaptic excitability caused by HO**  
569 **dysregulation. A1.** Representative inspiratory drive current received by hypoglossal neurons in  
570 ChrMP (purple) and in Apamin (200  $\mu$ M, gold) where apamin increased the drive current >100  
571 pA. Scale bars: 1 s x 50 pA. **A2.** Representative inspiratory drive current hypoglossal neuron in  
572 ChrMP (purple) and in Apamin (gold) where apamin increased the drive current by less than  
573 <100 pA Scale bars: 1 s x 50 pA. **A3.** Comparison of inspiratory drive currents from  
574 hypoglossal neurons exposed to ChrMP (200  $\mu$ M) then treated with Apamin (n=6). The effect  
575 of ChrMP on baseline disinhibited drive current for each of these neurons were reported in Fig  
576 4A. **B.** (left) Representative trace of bursting of a hypoglossal neuron resulting from preBötC  
577 drive during ChrMP (purple) and in Apamin (gold) (n=8). Scale bars: 20 mV x 500 msec. (right)



578 Comparison of action potentials generated per preBötC burst during ChrMP and Apamin (n=8).  
579 The effect of ChrMP on baseline action potential generated per preBötC burst for each of these  
580 neurons were reported in Fig 4B. **C.** (left) Representative traces of current clamp recordings in  
581 response to ramp current injection in ChrMP (purple) and in Apamin (gold). Scale bar: 500msec  
582 x 10mV). (right) Rheobase comparison from inspiratory XIIIn neurons during ChrMP and Apamin  
583 (n=7). The effect of ChrMP on baseline rheobase for each of these neurons were reported in  
584 Fig 4C.  
585

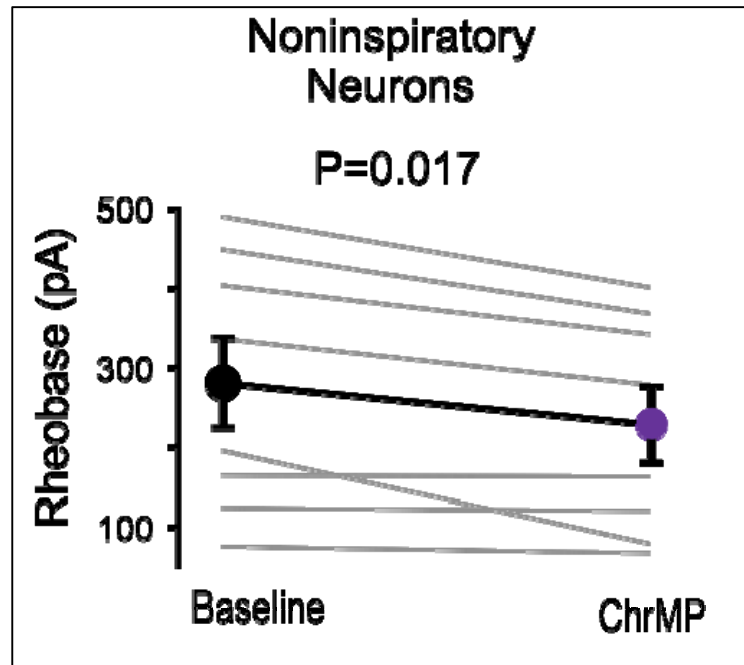

586 **Supplemental Figure 1: ChrMP459 decreases rheobase of non-inspiratory hypoglossal**  
587 **neurons.** Comparison of rheobase from non-inspiratory hypoglossal neurons in baseline and  
588 ChrMP (n=8). Non-inspiratory hypoglossal neurons were defined as neurons that did not  
589 receive synaptic drive in-phase with a preBötC burst. Neurons were disinhibited from fast  
590 synaptic inhibition using 50 $\mu$ M PTX and 1 $\mu$ M Strychnine.

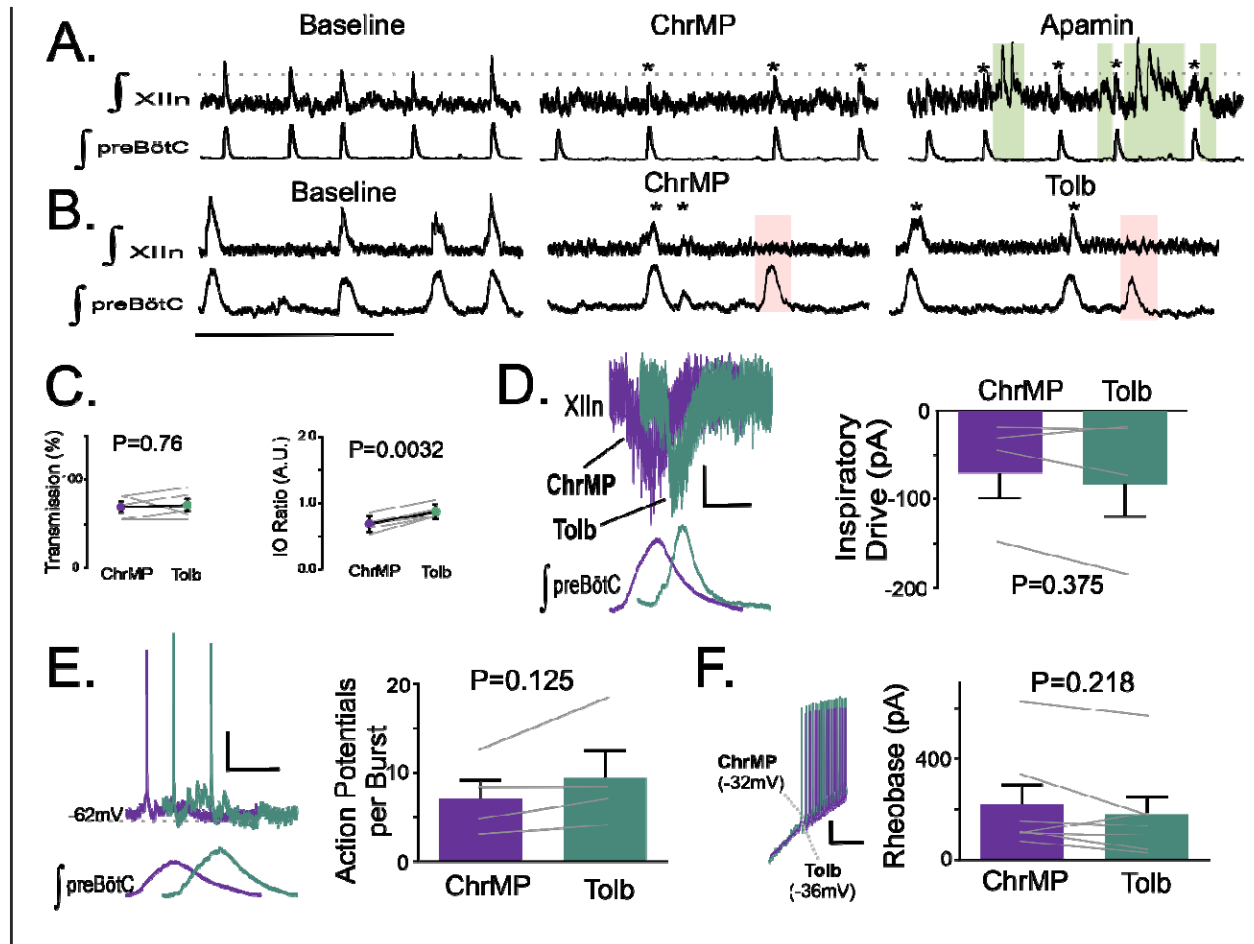

591 **Supplemental Figure 2: Apamin produce ectopic hypoglossal network activity during**  
 592 **ChrMP459 and tolbutamide has limited effects on network and inspiratory hypoglossal**  
 593 **neurons activity during ChrMP459. A.** Representative traces of integrated network activity of  
 594 the preBötC (top) and XIIIn (bottom) in slices from WT mice Baseline, ChrMP, and in 200  $\mu$ M  
 595 Apamin. Asterisks (\*) indicate detected hypoglossal output in phase with the preBötC. Green  
 596 box indicates ectopic network bursting. Scale bar 10 sec. Due to ectopic bursting within and  
 597 around rhythmic burst transmissions, analysis of apamin at the network level could not be  
 598 accurately detected. **B.** Representative traces of integrated network activity of the preBötC (top)  
 599 and XIIIn (bottom) in slices from WT mice Baseline, ChrMP, and in tolbutamide (200  $\mu$ M, Tolb).

600 Asterisks (\*) indicate detected hypoglossal output in phase with the preBötC. Pink box indicates  
601 cycles where preBötC drive failed to produce activity in the XIIIn. **C.** Comparisons of  
602 Transmission (left) and I/O ratio (right) in ChrMP459 and in Tolbutamide (n=5). **D.** (top)  
603 Representative traces of inspiratory drive currents in ChrMP (purple) and in Tolb (green). Scale  
604 bar 1 sec x 50 pA. (bottom) Comparison disinhibited inspiratory drive currents in ChrMP and  
605 Tolb (n=4). The effect of ChrMP on baseline drive current for each of these neurons were  
606 reported in Fig 4B. **E.** (left) Representative trace of bursting of a hypoglossal neuron resulting  
607 from preBötC drive during ChrMP (purple) and in Tolb (green) (n=4). Scale bars: 10 mV x  
608 500 msec. (right) Comparison of action potentials generated per preBötC burst during ChrMP  
609 and Tolb (n=4). The effect of ChrMP on baseline action potentials generated per preBötC burst  
610 for each of these neurons were reported in Fig 4C. **F.** (left) Representative traces of current  
611 clamp recordings in response to ramp current injection in ChrMP (purple) and in Tolb (green).  
612 Scale bar: 1 sec x 10mV). (right) Rheobase comparison from inspiratory hypoglossal neurons  
613 during ChrMP and Tolb (n=7). The effect of ChrMP on rheobase for each of these neurons were  
614 reported in Fig 4C.

615 **Citations**

- 616 1 Lyons, M. M., Bhatt, N. Y., Pack, A. I. & Magalang, U. J. Global burden of sleep-  
617 disordered breathing and its implications. *Respirology* **25**, 690-702,  
618 doi:10.1111/resp.13838 (2020).
- 619 2 Malhotra, A. *et al.* Metrics of sleep apnea severity: beyond the apnea-hypopnea index.  
620 *Sleep* **44**, doi:10.1093/sleep/zsab030 (2021).
- 621 3 Mehra, R. Sleep apnea and the heart. *Cleve Clin J Med* **86**, 10-18,  
622 doi:10.3949/ccjm.86.s1.03 (2019).
- 623 4 Yeghiazarians, Y. *et al.* Obstructive Sleep Apnea and Cardiovascular Disease: A  
624 Scientific Statement From the American Heart Association. *Circulation* **144**, e56-e67,  
625 doi:10.1161/CIR.0000000000000988 (2021).
- 626 5 Loffler, K. A. *et al.* Continuous Positive Airway Pressure Treatment, Glycemia, and  
627 Diabetes Risk in Obstructive Sleep Apnea and Comorbid Cardiovascular Disease.  
628 *Diabetes Care* **43**, 1859-1867, doi:10.2337/dc19-2006 (2020).
- 629 6 Hua, F. New insights into diabetes mellitus and its complications: a narrative review. *Ann*  
630 *Transl Med* **8**, 1689, doi:10.21037/atm-20-7243 (2020).
- 631 7 Daulatzai, M. A. Cerebral hypoperfusion and glucose hypometabolism: Key  
632 pathophysiological modulators promote neurodegeneration, cognitive impairment, and  
633 Alzheimer's disease. *J Neurosci Res* **95**, 943-972, doi:10.1002/jnr.23777 (2017).
- 634 8 Force, U. S. P. S. T. *et al.* Screening for Obstructive Sleep Apnea in Adults: US  
635 Preventive Services Task Force Recommendation Statement. *JAMA* **317**, 407-414,  
636 doi:10.1001/jama.2016.20325 (2017).
- 637 9 Castro, D. & Freeman, L. A. in *StatPearls* (2022).
- 638 10 Genta, P. R. *et al.* Airflow Shape Is Associated With the Pharyngeal Structure Causing  
639 OSA. *Chest* **152**, 537-546, doi:10.1016/j.chest.2017.06.017 (2017).
- 640 11 Neelapu, B. C. *et al.* Craniofacial and upper airway morphology in adult obstructive sleep  
641 apnea patients: A systematic review and meta-analysis of cephalometric studies. *Sleep*  
642 *Med Rev* **31**, 79-90, doi:10.1016/j.smr.2016.01.007 (2017).
- 643 12 Vos, W. G., De Backer, W. A. & Verhulst, S. L. Correlation between the severity of sleep  
644 apnea and upper airway morphology in pediatric and adult patients. *Curr Opin Allergy*  
645 *Clin Immunol* **10**, 26-33, doi:10.1097/ACI.0b013e328334f659 (2010).
- 646 13 Kubin, L. Neural Control of the Upper Airway: Respiratory and State-Dependent  
647 Mechanisms. *Compr Physiol* **6**, 1801-1850, doi:10.1002/cphy.c160002 (2016).

- 648 14 Eckert, D. J., White, D. P., Jordan, A. S., Malhotra, A. & Wellman, A. Defining  
649 phenotypic causes of obstructive sleep apnea. Identification of novel therapeutic targets.  
650 *Am J Respir Crit Care Med* **188**, 996-1004, doi:10.1164/rccm.201303-0448OC (2013).
- 651 15 Nemati, S. *et al.* Model-based characterization of ventilatory stability using spontaneous  
652 breathing. *J Appl Physiol (1985)* **111**, 55-67, doi:10.1152/jappphysiol.01358.2010  
653 (2011).
- 654 16 Peng, Y. J. *et al.* Complementary roles of gasotransmitters CO and H<sub>2</sub>S in sleep apnea.  
655 *Proc Natl Acad Sci U S A* **114**, 1413-1418, doi:10.1073/pnas.1620717114 (2017).
- 656 17 Peng, Y. J., Zhang, X., Nanduri, J. & Prabhakar, N. R. Therapeutic Targeting of the  
657 Carotid Body for Treating Sleep Apnea in a Pre-clinical Mouse Model. *Adv Exp Med Biol*  
658 **1071**, 109-114, doi:10.1007/978-3-319-91137-3\_14 (2018).
- 659 18 Osman, A. M., Carter, S. G., Carberry, J. C. & Eckert, D. J. Obstructive sleep apnea:  
660 current perspectives. *Nat Sci Sleep* **10**, 21-34, doi:10.2147/NSS.S124657 (2018).
- 661 19 Prabhakar, N. R. & Semenza, G. L. Gaseous messengers in oxygen sensing. *J Mol Med*  
662 (*Berl*) **90**, 265-272, doi:10.1007/s00109-012-0876-1 (2012).
- 663 20 Mancuso, C. Heme oxygenase and its products in the nervous system. *Antioxid Redox*  
664 *Signal* **6**, 878-887, doi:10.1089/ars.2004.6.878 (2004).
- 665 21 Schwartz, A. R. *et al.* Obesity and obstructive sleep apnea: pathogenic mechanisms and  
666 therapeutic approaches. *Proc Am Thorac Soc* **5**, 185-192, doi:10.1513/pats.200708-  
667 137MG (2008).
- 668 22 Horner, R. L. The neuropharmacology of upper airway motor control in the awake and  
669 asleep states: implications for obstructive sleep apnoea. *Respir Res* **2**, 286-294,  
670 doi:10.1186/rr71 (2001).
- 671 23 Horner, R. L. Emerging principles and neural substrates underlying tonic sleep-state-  
672 dependent influences on respiratory motor activity. *Philos Trans R Soc Lond B Biol Sci*  
673 **364**, 2553-2564, doi:10.1098/rstb.2009.0065 (2009).
- 674 24 Horton, G. A. *et al.* Activation of the Hypoglossal to Tongue Musculature Motor Pathway  
675 by Remote Control. *Sci Rep* **7**, 45860, doi:10.1038/srep45860 (2017).
- 676 25 Fleury Curado, T. *et al.* Chemogenetic stimulation of the hypoglossal neurons improves  
677 upper airway patency. *Sci Rep* **7**, 44392, doi:10.1038/srep44392 (2017).
- 678 26 Fleury Curado, T. A. *et al.* Silencing of Hypoglossal Motoneurons Leads to Sleep  
679 Disordered Breathing in Lean Mice. *Front Neurol* **9**, 962, doi:10.3389/fneur.2018.00962  
680 (2018).
- 681 27 Yuan, S. *et al.* Hydrogen sulfide metabolism regulates endothelial solute barrier function.  
682 *Redox Biol* **9**, 157-166, doi:10.1016/j.redox.2016.08.004 (2016).
- 683 28 Garcia, A. J., 3rd, Dashevskiy, T., Khuu, M. A. & Ramirez, J. M. Chronic Intermittent  
684 Hypoxia Differentially Impacts Different States of Inspiratory Activity at the Level of the  
685 preBotzinger Complex. *Front Physiol* **8**, 571, doi:10.3389/fphys.2017.00571 (2017).
- 686 29 Koizumi, H. *et al.* Structural-functional properties of identified excitatory and inhibitory  
687 interneurons within pre-Botzinger complex respiratory microcircuits. *J Neurosci* **33**,  
688 2994-3009, doi:10.1523/JNEUROSCI.4427-12.2013 (2013).

- 689 30 Reville, A. L. *et al.* Dbx1 precursor cells are a source of inspiratory XII premotoneurons.  
690 *Elife* **4**, doi:10.7554/eLife.12301 (2015).
- 691 31 Garcia, A. J., 3rd *et al.* Chronic Intermittent Hypoxia Alters Local Respiratory Circuit  
692 Function at the Level of the preBotzinger Complex. *Front Neurosci* **10**, 4,  
693 doi:10.3389/fnins.2016.00004 (2016).
- 694 32 Ding, Y., Li, Y. L. & Schultz, H. D. Downregulation of carbon monoxide as well as nitric  
695 oxide contributes to peripheral chemoreflex hypersensitivity in heart failure rabbits. *J*  
696 *Appl Physiol (1985)* **105**, 14-23, doi:10.1152/jappphysiol.01345.2007 (2008).
- 697 33 Prabhakar, N. R. Carbon monoxide (CO) and hydrogen sulfide (H<sub>2</sub>S) in hypoxic  
698 sensing by the carotid body. *Respir Physiol Neurobiol* **184**, 165-169,  
699 doi:10.1016/j.resp.2012.05.022 (2012).
- 700 34 Morikawa, T. *et al.* Hypoxic regulation of the cerebral microcirculation is mediated by a  
701 carbon monoxide-sensitive hydrogen sulfide pathway. *Proc Natl Acad Sci U S A* **109**,  
702 1293-1298, doi:10.1073/pnas.1119658109 (2012).
- 703 35 Mustafa, A. K. *et al.* Hydrogen sulfide as endothelium-derived hyperpolarizing factor  
704 sulfhydrates potassium channels. *Circ Res* **109**, 1259-1268,  
705 doi:10.1161/CIRCRESAHA.111.240242 (2011).
- 706 36 Haller, M., Mironov, S. L., Karschin, A. & Richter, D. W. Dynamic activation of K(ATP)  
707 channels in rhythmically active neurons. *J Physiol* **537**, 69-81, doi:10.1111/j.1469-  
708 7793.2001.0069k.x (2001).
- 709 37 Lape, R. & Nistri, A. Current and voltage clamp studies of the spike medium  
710 afterhyperpolarization of hypoglossal motoneurons in a rat brain stem slice preparation.  
711 *J Neurophysiol* **83**, 2987-2995, doi:10.1152/jn.2000.83.5.2987 (2000).
- 712 38 Zanella, S. *et al.* When norepinephrine becomes a driver of breathing irregularities: how  
713 intermittent hypoxia fundamentally alters the modulatory response of the respiratory  
714 network. *J Neurosci* **34**, 36-50, doi:10.1523/JNEUROSCI.3644-12.2014 (2014).
- 715 39 Enokido, Y. *et al.* Cystathionine beta-synthase, a key enzyme for homocysteine  
716 metabolism, is preferentially expressed in the radial glia/astrocyte lineage of developing  
717 mouse CNS. *FASEB J* **19**, 1854-1856, doi:10.1096/fj.05-3724fje (2005).
- 718 40 da Silva, G. S. F. *et al.* Excitatory Modulation of the preBotzinger Complex Inspiratory  
719 Rhythm Generating Network by Endogenous Hydrogen Sulfide. *Front Physiol* **8**, 452,  
720 doi:10.3389/fphys.2017.00452 (2017).
- 721
